# Supplementary material
Source: MDPI journal article supplement (https://www.mdpi.com/2073-4395/14/1/158)
Supplement: s1 [file s1]

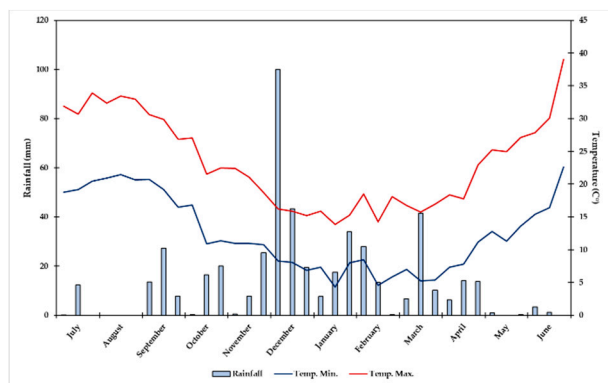

(a)

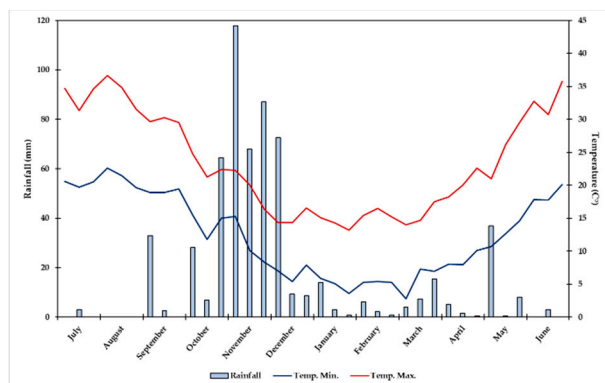

(b)

**Figure S1.** Temperature and rainfalls trends at the experimental site: (a) growing season 2020–2021; (b) growing season 2021–2022.
